# Supplementary material
Source: Springer Nature journal article supplement (https://www.springermedizin.de/resource/supplementary/12955_2014_1307_MOESM2_ESM.pdf/9559518)
Supplement: MOESM2 [file 9559518]

Table A2

True mean differences ( $PI_{DIFF}$ ) and Impact of non-invariant Items on latent ( $ES_{SI-PI}$ ; white) and composite ( $ES_{PI-ALL}$ ,  $ES_{PI-RES}$ , grey) mean differences

| Disease group                                |                           | Ortho  | Rheu    | Asthma | COPD  | Cancer |                            |
|----------------------------------------------|---------------------------|--------|---------|--------|-------|--------|----------------------------|
| <b>Health-directed behavior</b>              |                           |        |         |        |       |        |                            |
| <b>Ortho</b>                                 |                           |        | <0.01   | 0.01   | 0.10  | 0.09   | <b>ES<sub>PI-ALL</sub></b> |
|                                              |                           |        | a       | a      | <0.01 | a      | <b>ES<sub>PI-RED</sub></b> |
| <b>Rheu</b>                                  | <b>PI<sub>Diff</sub></b>  | -0.15  |         | <0.01  | 0.10  | 0.10   | <b>ES<sub>PI-ALL</sub></b> |
|                                              | <b>ES<sub>SI-PI</sub></b> | >-0.01 |         | a      | 0.011 | a      | <b>ES<sub>PI-RED</sub></b> |
| <b>Asthma</b>                                | <b>PI<sub>Diff</sub></b>  | -0.01  | 0.139   |        | 0.08  | 0.10   | <b>ES<sub>PI-ALL</sub></b> |
|                                              | <b>ES<sub>SI-PI</sub></b> | >-0.01 | 0.000   |        | 0.01  | a      | <b>ES<sub>PI-RED</sub></b> |
| <b>COPD</b>                                  | <b>PI<sub>Diff</sub></b>  | 0.20   | 0.36    | 0.18   |       | 0.19   | <b>ES<sub>PI-ALL</sub></b> |
|                                              | <b>ES<sub>SI-PI</sub></b> | 0.11   | 0.12    | 0.10   |       | 0.15   | <b>ES<sub>PI-RED</sub></b> |
| <b>Cancer</b>                                | <b>PI<sub>Diff</sub></b>  | -0.68  | -0.55   | 0.69   | -0.89 |        |                            |
|                                              | <b>ES<sub>SI-PI</sub></b> | >-0.01 | >-0.01  | >-0.01 | -0.12 |        |                            |
| <b>Constructive attitudes and approaches</b> |                           |        |         |        |       |        |                            |
| <b>Ortho</b>                                 |                           |        | 0.03    | 0.02   | 0.01  | 0.02   | <b>ES<sub>PI-ALL</sub></b> |
|                                              |                           |        | <0.01   | a      | 0.03  | a      | <b>ES<sub>PI-RED</sub></b> |
| <b>Rheu</b>                                  | <b>PI<sub>Diff</sub></b>  | 0.31   |         | 0.01   | 0.02  | 0.01   | <b>ES<sub>PI-ALL</sub></b> |
|                                              | <b>ES<sub>SI-PI</sub></b> | -0.05  |         | 0.01   | 0.02  | 0.08   | <b>ES<sub>PI-RED</sub></b> |
| <b>Asthma</b>                                | <b>PI<sub>Diff</sub></b>  | -0.24  | -0.54   |        | 0.01  | 0.01   | <b>ES<sub>PI-ALL</sub></b> |
|                                              | <b>ES<sub>SI-PI</sub></b> | 0.00   | -0.05   |        | 0.01  | a      | <b>ES<sub>PI-RED</sub></b> |
| <b>COPD</b>                                  | <b>PI<sub>Diff</sub></b>  | 0.02   | -0.33   | 0.19   |       | 0.02   | <b>ES<sub>PI-ALL</sub></b> |
|                                              | <b>ES<sub>SI-PI</sub></b> | 0.01   | 0.01    | -0.03  |       | 0.05   | <b>ES<sub>PI-RED</sub></b> |
| <b>Cancer</b>                                | <b>PI<sub>Diff</sub></b>  | -0.32  | -0.64   | -0.07  | -0.30 |        |                            |
|                                              | <b>ES<sub>SI-PI</sub></b> | 0.00   | 0.05    | 0.00   | 0.04  |        |                            |
| <b>Emotional distress</b>                    |                           |        |         |        |       |        |                            |
| <b>Ortho</b>                                 |                           |        | 0.04    | 0.01   | <0.01 | 0.08   | <b>ES<sub>PI-ALL</sub></b> |
|                                              |                           |        | 0.03    | 0.02   | 0.01  | 0.011  | <b>ES<sub>PI-RED</sub></b> |
| <b>Rheu</b>                                  | <b>PI<sub>Diff</sub></b>  | -0.69  |         | 0.06   | 0.03  | 0.03   | <b>ES<sub>PI-ALL</sub></b> |
|                                              | <b>ES<sub>SI-PI</sub></b> | 0.01   |         | a      | a     | 0.02   | <b>ES<sub>PI-RED</sub></b> |
| <b>Asthma</b>                                | <b>PI<sub>Diff</sub></b>  | 0.13   | 0.83    |        | 0.01  | 0.01   | <b>ES<sub>PI-ALL</sub></b> |
|                                              | <b>ES<sub>SI-PI</sub></b> | <0.01  | < -0.01 |        | a     | 0.01   | <b>ES<sub>PI-RED</sub></b> |
| <b>COPD</b>                                  | <b>PI<sub>Diff</sub></b>  | -0.43  | 0.26    | -0.49  |       | 0.07   | <b>ES<sub>PI-ALL</sub></b> |
|                                              | <b>ES<sub>SI-PI</sub></b> | 0.01   | 0.000   | <0.01  |       | 0.04   | <b>ES<sub>PI-RED</sub></b> |
| <b>Cancer</b>                                | <b>PI<sub>Diff</sub></b>  | 0.01   | 0.80    | -0.04  | 0.53  |        |                            |
|                                              | <b>ES<sub>SI-PI</sub></b> | -0.06  | -0.06   | -0.07  | -0.06 |        |                            |
| <b>Skill and technique acquisition</b>       |                           |        |         |        |       |        |                            |

|                                  |                           |         |              |       |       |              |                            |
|----------------------------------|---------------------------|---------|--------------|-------|-------|--------------|----------------------------|
| <b>Ortho</b>                     |                           |         | <0.01        | 0.14  | 0.07  | 0.02         | <b>ES<sub>PI-ALL</sub></b> |
|                                  |                           |         | 0.02         | 0.06  | 0.03  | 0.02         | <b>ES<sub>PI-RED</sub></b> |
| <b>Rheu</b>                      | <b>PI<sub>Diff</sub></b>  | 0.20    |              | 0.14  | 0.06  | 0.02         | <b>ES<sub>PI-ALL</sub></b> |
|                                  | <b>ES<sub>SI-PI</sub></b> | < -0.01 |              | 0.80  | 0.02  | <sup>a</sup> | <b>ES<sub>PI-RED</sub></b> |
| <b>Asthma</b>                    | <b>PI<sub>Diff</sub></b>  | -0.50   | -0.69        |       | 0.05  | 0.09         | <b>ES<sub>PI-ALL</sub></b> |
|                                  | <b>ES<sub>SI-PI</sub></b> | -0.03   | 0.02         |       | 0.09  | 0.02         | <b>ES<sub>PI-RED</sub></b> |
| <b>COPD</b>                      | <b>PI<sub>Diff</sub></b>  | -0.20   | -0.39        | 0.23  |       | 0.05         | <b>ES<sub>PI-ALL</sub></b> |
|                                  | <b>ES<sub>SI-PI</sub></b> | -0.02   | -0.04        | 0.00  |       | 0.07         | <b>ES<sub>PI-RED</sub></b> |
| <b>Cancer</b>                    | <b>PI<sub>Diff</sub></b>  | -0.47   | -0.67        | 0.00  | -0.25 |              |                            |
|                                  | <b>ES<sub>SI-PI</sub></b> | < -0.01 | 0.00         | 0.00  | 0.02  |              |                            |
| <b>Health-Service Navigation</b> |                           |         |              |       |       |              |                            |
| <b>Ortho</b>                     |                           |         | 0.00         | 0.14  | 0.16  | 0.14         | <b>ES<sub>PI-ALL</sub></b> |
|                                  |                           |         | <sup>a</sup> | 0.07  | 0.09  | 0.03         | <b>ES<sub>PI-RED</sub></b> |
| <b>Rheu</b>                      | <b>PI<sub>Diff</sub></b>  | 0.25    |              | 0.14  | 0.15  | 0.14         | <b>ES<sub>PI-ALL</sub></b> |
|                                  | <b>ES<sub>SI-PI</sub></b> | < -0.01 |              | 0.02  | 0.04  | 0.02         | <b>ES<sub>PI-RED</sub></b> |
| <b>Asthma</b>                    | <b>PI<sub>Diff</sub></b>  | -0.06   | -0.31        |       | 0.01  | 0.01         | <b>ES<sub>PI-ALL</sub></b> |
|                                  | <b>ES<sub>SI-PI</sub></b> | 0.13    | 0.12         |       | 0.01  | 0.06         | <b>ES<sub>PI-RED</sub></b> |
| <b>COPD</b>                      | <b>PI<sub>Diff</sub></b>  | -0.07   | -0.31        | -0.01 |       | 0.03         | <b>ES<sub>PI-ALL</sub></b> |
|                                  | <b>ES<sub>SI-PI</sub></b> | 0.13    | 0.12         | -0.02 |       | 0.07         | <b>ES<sub>PI-RED</sub></b> |
| <b>Cancer</b>                    | <b>PI<sub>Diff</sub></b>  | -0.48   | -0.72        | -0.42 | -0.41 |              |                            |
|                                  | <b>ES<sub>SI-PI</sub></b> | 0.15    | 0.14         | 0.01  | 0.01  |              |                            |

Notes: Ortho: orthopedic condition; Rheu: rheumatism; PI<sub>Diff</sub>: Estimations of latent mean differences in partial invariance models; ES<sub>SI-PI</sub>: Difference between estimations of latent mean differences between strict and partial invariance models; ES<sub>PI-ALL</sub>: Difference between latent mean differences in partial invariance models and composite mean differences using all items of a scale; ES<sub>PI-RED</sub>: Difference between latent mean differences in partial invariance models and composite mean differences using only items with pairwise non-invariant parameters; <sup>a</sup> no item with DIF between groups
